# Supplementary material
Source: Springer Nature journal article supplement (https://www.springermedizin.de/resource/supplementary/13063_2013_2103_MOESM2_ESM.pdf/9621380)
Supplement: MOESM2 [file 9621380]

Subject must still be on vasopressors when EAA drawn  $\geq 2$  hrs after reaching qualifying vasopressor dosing

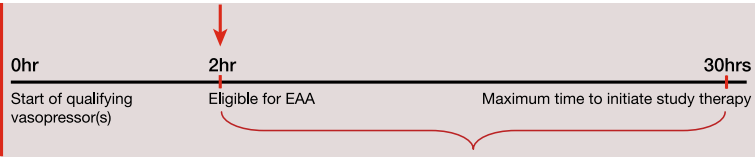

Subject can be enrolled on any dose of vasopressors or they can be off vasopressors after the qualifying EAA is drawn as long as study therapy is initiated before the 30 hour window
